# Supplementary material for: COVID-19 and influenza infections mediate distinct pulmonary cellular and transcriptomic changes
Source: PubMed Central journal article supplement (PMC10719262; doi:10.1038/s42003-023-05626-z), 2023-12-13
Supplement: 42003_2023_5626_MOESM3_ESM.pdf [file 42003_2023_5626_MOESM3_ESM.pdf]

## Description of Additional Supplementary Files

1  
2  
3  
4  
5  
6  
7  
8  
9  
10  
11  
12  
13  
14  
15  
16  
17  
18  
19  
20  
21  
22  
23  
24  
25  
26  
27  
28  
29  
30  
31  
32  
33

**File name:** Supplemental Data 1

**Description:** Differential gene expression of K18\_COVID\_21dpi\_vs\_K18\_Naive

**File name:** Supplemental Data 2

**Description:** Differential Collagen gene expression of K18\_COVID\_21dpi\_vs\_K18\_Naive

**File name:** Supplemental Data 3

**Description:** Differential gene expression of COVID\_21dpi\_vs\_COVID\_21dpi

**File name:** Supplemental Data 4

**Description:** Three groups comparison\_Differential gene expression\_COVID\_4dpi

**File name:** Supplemental Data 5

**Description:** Three groups comparison\_Differential gene expression\_COVID\_6dpi

**File name:** Supplemental Data 6

**Description:** Differential gene expression of Flu\_4dpi\_vs\_Covid\_4dpi

**File name:** Supplemental Data 7

**Description:** Differential gene expression of Flu\_6dpi\_vs\_Covid\_6dpi

**File name:** Supplemental Data 8

**Description:** Differential gene expression\_scRNA\_Flu K18 4 DPI vs COVID K18 4 DPI in epithelial cell

**File name:** Supplemental Data 9

**Description:** DEG analysis scRNA individual data (Flu 4 &6 DPI and COVID 4 DPI)

**File name:** Supplemental Data 10

**Description:** The source data behind the graphs in the paper
