# Supplementary material for: COVID-19 and influenza infections mediate distinct pulmonary cellular and transcriptomic changes
Source: PubMed Central journal article supplement (PMC10719262; doi:10.1038/s42003-023-05626-z), 2023-12-13
Supplement: 42003_2023_5626_MOESM7_ESM.pdf [file 42003_2023_5626_MOESM7_ESM.pdf]

## Reporting Summary

Nature Portfolio wishes to improve the reproducibility of the work that we publish. This form provides structure for consistency and transparency in reporting. For further information on Nature Portfolio policies, see our [Editorial Policies](#) and the [Editorial Policy Checklist](#).

### Statistics

For all statistical analyses, confirm that the following items are present in the figure legend, table legend, main text, or Methods section.

- | n/a                                 | Confirmed                                                                                                                                                                                                                                                                                      |
|-------------------------------------|------------------------------------------------------------------------------------------------------------------------------------------------------------------------------------------------------------------------------------------------------------------------------------------------|
| <input type="checkbox"/>            | <input checked="" type="checkbox"/> The exact sample size ( $n$ ) for each experimental group/condition, given as a discrete number and unit of measurement                                                                                                                                    |
| <input type="checkbox"/>            | <input checked="" type="checkbox"/> A statement on whether measurements were taken from distinct samples or whether the same sample was measured repeatedly                                                                                                                                    |
| <input type="checkbox"/>            | <input checked="" type="checkbox"/> The statistical test(s) used AND whether they are one- or two-sided<br><i>Only common tests should be described solely by name; describe more complex techniques in the Methods section.</i>                                                               |
| <input type="checkbox"/>            | <input checked="" type="checkbox"/> A description of all covariates tested                                                                                                                                                                                                                     |
| <input type="checkbox"/>            | <input checked="" type="checkbox"/> A description of any assumptions or corrections, such as tests of normality and adjustment for multiple comparisons                                                                                                                                        |
| <input type="checkbox"/>            | <input checked="" type="checkbox"/> A full description of the statistical parameters including central tendency (e.g. means) or other basic estimates (e.g. regression coefficient) AND variation (e.g. standard deviation) or associated estimates of uncertainty (e.g. confidence intervals) |
| <input type="checkbox"/>            | <input checked="" type="checkbox"/> For null hypothesis testing, the test statistic (e.g. $F$ , $t$ , $r$ ) with confidence intervals, effect sizes, degrees of freedom and $P$ value noted<br><i>Give <math>P</math> values as exact values whenever suitable.</i>                            |
| <input checked="" type="checkbox"/> | <input type="checkbox"/> For Bayesian analysis, information on the choice of priors and Markov chain Monte Carlo settings                                                                                                                                                                      |
| <input checked="" type="checkbox"/> | <input type="checkbox"/> For hierarchical and complex designs, identification of the appropriate level for tests and full reporting of outcomes                                                                                                                                                |
| <input checked="" type="checkbox"/> | <input type="checkbox"/> Estimates of effect sizes (e.g. Cohen's $d$ , Pearson's $r$ ), indicating how they were calculated                                                                                                                                                                    |

*Our web collection on [statistics for biologists](#) contains articles on many of the points above.*

### Software and code

Policy information about [availability of computer code](#)

Data collection

Data analysis

For manuscripts utilizing custom algorithms or software that are central to the research but not yet described in published literature, software must be made available to editors and reviewers. We strongly encourage code deposition in a community repository (e.g. GitHub). See the Nature Portfolio [guidelines for submitting code & software](#) for further information.

### Data

Policy information about [availability of data](#)

All manuscripts must include a [data availability statement](#). This statement should provide the following information, where applicable:

- Accession codes, unique identifiers, or web links for publicly available datasets
- A description of any restrictions on data availability
- For clinical datasets or third party data, please ensure that the statement adheres to our [policy](#)

## Research involving human participants, their data, or biological material

Policy information about studies with [human participants or human data](#). See also policy information about [sex, gender \(identity/presentation\), and sexual orientation](#) and [race, ethnicity and racism](#).

|                                                                    |                                                                                                                                                                                                                                            |
|--------------------------------------------------------------------|--------------------------------------------------------------------------------------------------------------------------------------------------------------------------------------------------------------------------------------------|
| Reporting on sex and gender                                        | One female patient and two male patients were included as human data. We designed to included both sex in study design. Sex/ gender was determined by self-reporting or assigned. Human case summary is reported as supplemental table 12. |
| Reporting on race, ethnicity, or other socially relevant groupings | The socially constructed or socially relevant categorization variables are not used in the manuscript.                                                                                                                                     |
| Population characteristics                                         | The detailed information is summarized in supplemental table 12.                                                                                                                                                                           |
| Recruitment                                                        | Participants are recruited by the disease severity. Severe COVID patients showing pulmonary disease are further included in the study.                                                                                                     |
| Ethics oversight                                                   | Tulane University approved the study protocol.                                                                                                                                                                                             |

Note that full information on the approval of the study protocol must also be provided in the manuscript.

## Field-specific reporting

Please select the one below that is the best fit for your research. If you are not sure, read the appropriate sections before making your selection.

Life sciences       Behavioural & social sciences       Ecological, evolutionary & environmental sciences

For a reference copy of the document with all sections, see [nature.com/documents/nr-reporting-summary-flat.pdf](https://nature.com/documents/nr-reporting-summary-flat.pdf)

## Life sciences study design

All studies must disclose on these points even when the disclosure is negative.

|                 |                                                                                                                                                                                                                                                                                                                                                                             |
|-----------------|-----------------------------------------------------------------------------------------------------------------------------------------------------------------------------------------------------------------------------------------------------------------------------------------------------------------------------------------------------------------------------|
| Sample size     | In our previous published paper (doi: 10.7150/thno.61810. eCollection 2021.). We performed a comprehensive test on both male and female K18 mice infected with SARS-CoV-2. Based on these data, we didn't do statistical methods to predetermine sample size.                                                                                                               |
| Data exclusions | No data were excluded from the analysis.                                                                                                                                                                                                                                                                                                                                    |
| Replication     | Since our focus is long-term covid, we collected the tissue as long as 21 days and 45 days post infection. Together with the limitation of BSL3 facility, it is not practical to replicate the experiment for several times. To increase the vailability and reproductivity, we tested the samples from multiple time points such as 7, 14, 21, and 45 days post infection. |
| Randomization   | Randomization is not relevant to our study. To increase the validity, the virus is diluted from the same stock.                                                                                                                                                                                                                                                             |
| Blinding        | The pathologist performed the histology analysis is blinded to the animal grouping.                                                                                                                                                                                                                                                                                         |

## Reporting for specific materials, systems and methods

We require information from authors about some types of materials, experimental systems and methods used in many studies. Here, indicate whether each material, system or method listed is relevant to your study. If you are not sure if a list item applies to your research, read the appropriate section before selecting a response.

### Materials & experimental systems

| n/a                                 | Involved in the study                                           |
|-------------------------------------|-----------------------------------------------------------------|
| <input type="checkbox"/>            | <input checked="" type="checkbox"/> Antibodies                  |
| <input checked="" type="checkbox"/> | <input type="checkbox"/> Eukaryotic cell lines                  |
| <input checked="" type="checkbox"/> | <input type="checkbox"/> Palaeontology and archaeology          |
| <input type="checkbox"/>            | <input checked="" type="checkbox"/> Animals and other organisms |
| <input type="checkbox"/>            | <input checked="" type="checkbox"/> Clinical data               |
| <input checked="" type="checkbox"/> | <input type="checkbox"/> Dual use research of concern           |
| <input checked="" type="checkbox"/> | <input type="checkbox"/> Plants                                 |

### Methods

| n/a                                 | Involved in the study                           |
|-------------------------------------|-------------------------------------------------|
| <input checked="" type="checkbox"/> | <input type="checkbox"/> ChIP-seq               |
| <input checked="" type="checkbox"/> | <input type="checkbox"/> Flow cytometry         |
| <input checked="" type="checkbox"/> | <input type="checkbox"/> MRI-based neuroimaging |

## Antibodies

|                 |                                                                                                                                                                                                                                                                                                                                                                                                                                                                                                                                                                                                                                                                                                                                                                                                                                                                                                                                                                                                                                                                                                                                                                                                                                                                                                                                                                                                                                                                                                                                                                                                                                                                                                                                                                                                                                                                                                                                                                                                                                                          |
|-----------------|----------------------------------------------------------------------------------------------------------------------------------------------------------------------------------------------------------------------------------------------------------------------------------------------------------------------------------------------------------------------------------------------------------------------------------------------------------------------------------------------------------------------------------------------------------------------------------------------------------------------------------------------------------------------------------------------------------------------------------------------------------------------------------------------------------------------------------------------------------------------------------------------------------------------------------------------------------------------------------------------------------------------------------------------------------------------------------------------------------------------------------------------------------------------------------------------------------------------------------------------------------------------------------------------------------------------------------------------------------------------------------------------------------------------------------------------------------------------------------------------------------------------------------------------------------------------------------------------------------------------------------------------------------------------------------------------------------------------------------------------------------------------------------------------------------------------------------------------------------------------------------------------------------------------------------------------------------------------------------------------------------------------------------------------------------|
| Antibodies used | <p>Anti-SARS Anti-SARS-CoV 1: 1000 BEI Resources # NR-10361<br/>         Anti-CD206 Anti-mouse 1: 50 R &amp; D # AF2535<br/>         Anti-SMA Anti-mouse 1: 100 Abcam # ab5694-100<br/>         Anti-Krt-5 Anti-mouse 1: 1000 BioLegend # 905901<br/>         Anti-SMA Anti-human 1: 100 Agilent # M085129-2<br/>         Anti-Krt-5 Anti-human 1: 50 Abcam # ab17130<br/>         Anti-pro SPC Anti-mouse 1: 500 Seven Hills Bioreagents # WRAB-9337<br/>         Anti-trp63 Anti-mouse 1: 200 Cell Signaling Technology # 13109<br/>         Anti-NGFR Anti-mouse 1: 100 Abcam # ab52987</p>                                                                                                                                                                                                                                                                                                                                                                                                                                                                                                                                                                                                                                                                                                                                                                                                                                                                                                                                                                                                                                                                                                                                                                                                                                                                                                                                                                                                                                                           |
| Validation      | <p>The validation of each primary antibody is performed by manufacturers.<br/> <a href="https://www.beiresources.org/Catalog/BEIPolyclonalAntiserum/NR-10361.aspx">https://www.beiresources.org/Catalog/BEIPolyclonalAntiserum/NR-10361.aspx</a><br/> <a href="https://www.rndsystems.com/products/mouse-mmr-cd206-antibody_af2535">https://www.rndsystems.com/products/mouse-mmr-cd206-antibody_af2535</a><br/> <a href="https://www.abcam.com/products/primary-antibodies/alpha-smooth-muscle-actin-antibody-ab5694.html">https://www.abcam.com/products/primary-antibodies/alpha-smooth-muscle-actin-antibody-ab5694.html</a><br/> <a href="https://www.biolegend.com/fr-fr/explore-new-products/keratin-5-polyclonal-chicken-antibody-purified-10957">https://www.biolegend.com/fr-fr/explore-new-products/keratin-5-polyclonal-chicken-antibody-purified-10957</a><br/> <a href="https://www.agilent.com/en/product/immunohistochemistry/antibodies-controls/primary-antibodies/actin-%28smooth-muscle%29-%28concentrate%29-76542">https://www.agilent.com/en/product/immunohistochemistry/antibodies-controls/primary-antibodies/actin-%28smooth-muscle%29-%28concentrate%29-76542</a><br/> <a href="https://www.abcam.com/products/primary-antibodies/cytokeratin-5-antibody-xm26-ab17130.html">https://www.abcam.com/products/primary-antibodies/cytokeratin-5-antibody-xm26-ab17130.html</a><br/> <a href="https://www.sevenhillsbioreagents.com/products/anti-pro-sp-c-rabbit-n-terminal">https://www.sevenhillsbioreagents.com/products/anti-pro-sp-c-rabbit-n-terminal</a><br/> <a href="https://www.cellsignal.com/products/primary-antibodies/p63-a-d2k8x-xp-rabbit-mab/13109">https://www.cellsignal.com/products/primary-antibodies/p63-a-d2k8x-xp-rabbit-mab/13109</a><br/> <a href="https://www.abcam.com/products/primary-antibodies/p75-ngf-receptor-antibody-ep1039y-bsa-and-azide-free-ab256584.html">https://www.abcam.com/products/primary-antibodies/p75-ngf-receptor-antibody-ep1039y-bsa-and-azide-free-ab256584.html</a></p> |

## Animals and other research organisms

Policy information about [studies involving animals](#); [ARRIVE guidelines](#) recommended for reporting animal research, and [Sex and Gender in Research](#)

|                         |                                                                                                                                                                                                                                                                                                                                                                                                                                                                                                                                                                                                                                                                                                                                                                                                                                                                                                                                                                                                                                                                                                                                                                                                                                                                                                                                                                                                                                                                                                                 |
|-------------------------|-----------------------------------------------------------------------------------------------------------------------------------------------------------------------------------------------------------------------------------------------------------------------------------------------------------------------------------------------------------------------------------------------------------------------------------------------------------------------------------------------------------------------------------------------------------------------------------------------------------------------------------------------------------------------------------------------------------------------------------------------------------------------------------------------------------------------------------------------------------------------------------------------------------------------------------------------------------------------------------------------------------------------------------------------------------------------------------------------------------------------------------------------------------------------------------------------------------------------------------------------------------------------------------------------------------------------------------------------------------------------------------------------------------------------------------------------------------------------------------------------------------------|
| Laboratory animals      | <p>Strain Sex Sample Size Age/ week Inoculum Infection Dose Timepoint/DPI<br/>         K18-hACE2 +/- Male and Female 3 28 N/A N/A 0<br/>         K18-hACE2 +/- Male 1 16 SARS-CoV-2(WA1/2020) 1.0X 10<sup>4</sup>/ TCID 50 3<br/>         K18-hACE2 +/- Male and Female 3 6-10 SARS-CoV-2(WA1/2020) 2.0X 10<sup>4</sup>/ TCID 50 7<br/>         K18-hACE2 +/- Male and Female 3 12-16 SARS-CoV-2(WA1/2020) 1.0X 10<sup>4</sup>/ TCID 50 7<br/>         K18-hACE2 +/- Male and Female 3 12-16 SARS-CoV-2(WA1/2020) 1.0X 10<sup>4</sup>/ TCID 50 14<br/>         K18-hACE2 +/- Male and Female 3 10 SARS-CoV-2(WA1/2020) 1.0X 10<sup>4</sup>/ TCID 50 21<br/>         K18-hACE2 +/- Female 2 6-10 SARS-CoV-2(WA1/2020) 1.0X 10<sup>4</sup>/ TCID 50 45<br/>         C57BL/6J Male 3 6-8 H1N1 A/PR/8/34 (PR8) 50 PFU 7<br/>         C57BL/6J Male 4 6-8 H1N1 A/PR/8/34 (PR8) 50 PFU 14<br/>         C57BL/6J Male 5 6-8 H1N1 A/PR/8/34 (PR8) 50 PFU 21<br/>         K18-hACE2 +/- Female 4 8 N/A N/A 0<br/>         K18-hACE2 +/- Female 3 6-10 SARS-CoV-2(WA1/2020) 2.0X 10<sup>5</sup>/ TCID 50 4<br/>         K18-hACE2 +/- Female 3 6-10 SARS-CoV-2(WA1/2020) 2.0X 10<sup>5</sup>/ TCID 50 6<br/>         K18-hACE2 +/- Female 3 8-10 H1N1 A/PR/8/34 (PR8) 50 PFU 4<br/>         K18-hACE2 +/- Female 3 8-10 H1N1 A/PR/8/34 (PR8) 50 PFU 6<br/>         K18-hACE2 +/- Female 1 12 SARS-CoV-2(WA1/2020) 2.0X 10<sup>5</sup>/ TCID 50 4<br/>         K18-hACE2 +/- Female 1 12 H1N1 A/PR/8/34 (PR8) 50 PFU 4</p> |
| Wild animals            | No wild animals are included in the study                                                                                                                                                                                                                                                                                                                                                                                                                                                                                                                                                                                                                                                                                                                                                                                                                                                                                                                                                                                                                                                                                                                                                                                                                                                                                                                                                                                                                                                                       |
| Reporting on sex        | The finding applies to both sex. No sex-based analysis is performed.                                                                                                                                                                                                                                                                                                                                                                                                                                                                                                                                                                                                                                                                                                                                                                                                                                                                                                                                                                                                                                                                                                                                                                                                                                                                                                                                                                                                                                            |
| Field-collected samples | No field-collected samples are included in the study.                                                                                                                                                                                                                                                                                                                                                                                                                                                                                                                                                                                                                                                                                                                                                                                                                                                                                                                                                                                                                                                                                                                                                                                                                                                                                                                                                                                                                                                           |
| Ethics oversight        | Tulane University                                                                                                                                                                                                                                                                                                                                                                                                                                                                                                                                                                                                                                                                                                                                                                                                                                                                                                                                                                                                                                                                                                                                                                                                                                                                                                                                                                                                                                                                                               |

Note that full information on the approval of the study protocol must also be provided in the manuscript.

## Clinical data

Policy information about [clinical studies](#)

All manuscripts should comply with the ICMJE [guidelines for publication of clinical research](#) and a completed [CONSORT checklist](#) must be included with all submissions.

|                             |     |
|-----------------------------|-----|
| Clinical trial registration | N/A |
| Study protocol              | N/A |

Data collection

N/A

Outcomes

N/A
